# Supplementary material for: Correlations of Fecal Metabonomic and Microbiomic Changes Induced by High-fat Diet in the Pre-Obesity State
Source: PubMed Central journal article supplement (PMC4768318; doi:10.1038/srep21618), 2016-02-26
Supplement: srep21618-s1.pdf [file srep21618-s1.pdf]

## Supplementary data

### Correlations of Fecal Metabonomic and Microbiomic Changes Induced by High-fat Diet in the Pre-Obesity State

Hong Lin<sup>†#</sup>, Yanpeng An<sup>‡#</sup>, Fuhua Hao<sup>†</sup>, Yulan Wang<sup>†,§</sup>, and Huiru Tang<sup>\*#</sup>

<sup>†</sup> *CAS Key Laboratory of Magnetic Resonance in Biological Systems, State Key Laboratory of Magnetic Resonance and Atomic and Molecular Physics, National Centre for Magnetic Resonance in Wuhan, Wuhan Institute of Physics and Mathematics, University of Chinese Academy of Sciences, Wuhan, 430071, China*

<sup>‡</sup> *State Key Laboratory of Genetic Engineering, Collaborative Innovation Center for Genetics and Development, Ministry of Education Key Laboratory of Contemporary Anthropology, Metabonomics and Systems Biology Laboratory, School of Life Sciences, Fudan University, Shanghai, 200438, China*

<sup>§</sup> *Collaborative Innovation Center for Diagnosis and Treatment of Infectious Diseases, Zhejiang University, Hangzhou, 310058, China*

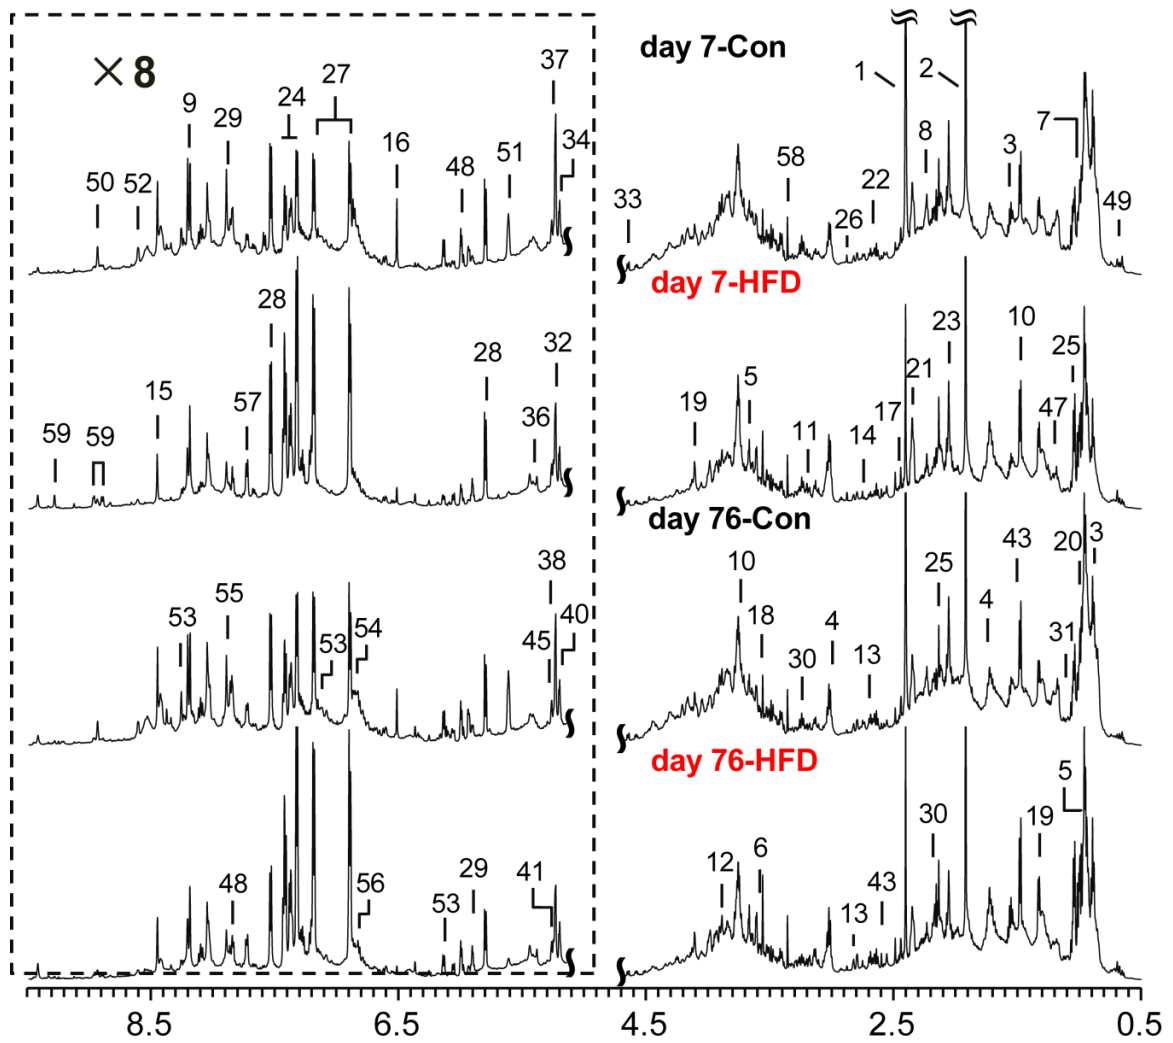

Supplementary Figure S1. Average  $^1\text{H}$  NMR spectra of fecal samples in control and HFD groups at day 7 and day 76 after treatment. The dotted area were vertically magnified 8 times. The metabolites were numbered and listed in Table S1 (Supporting Information)

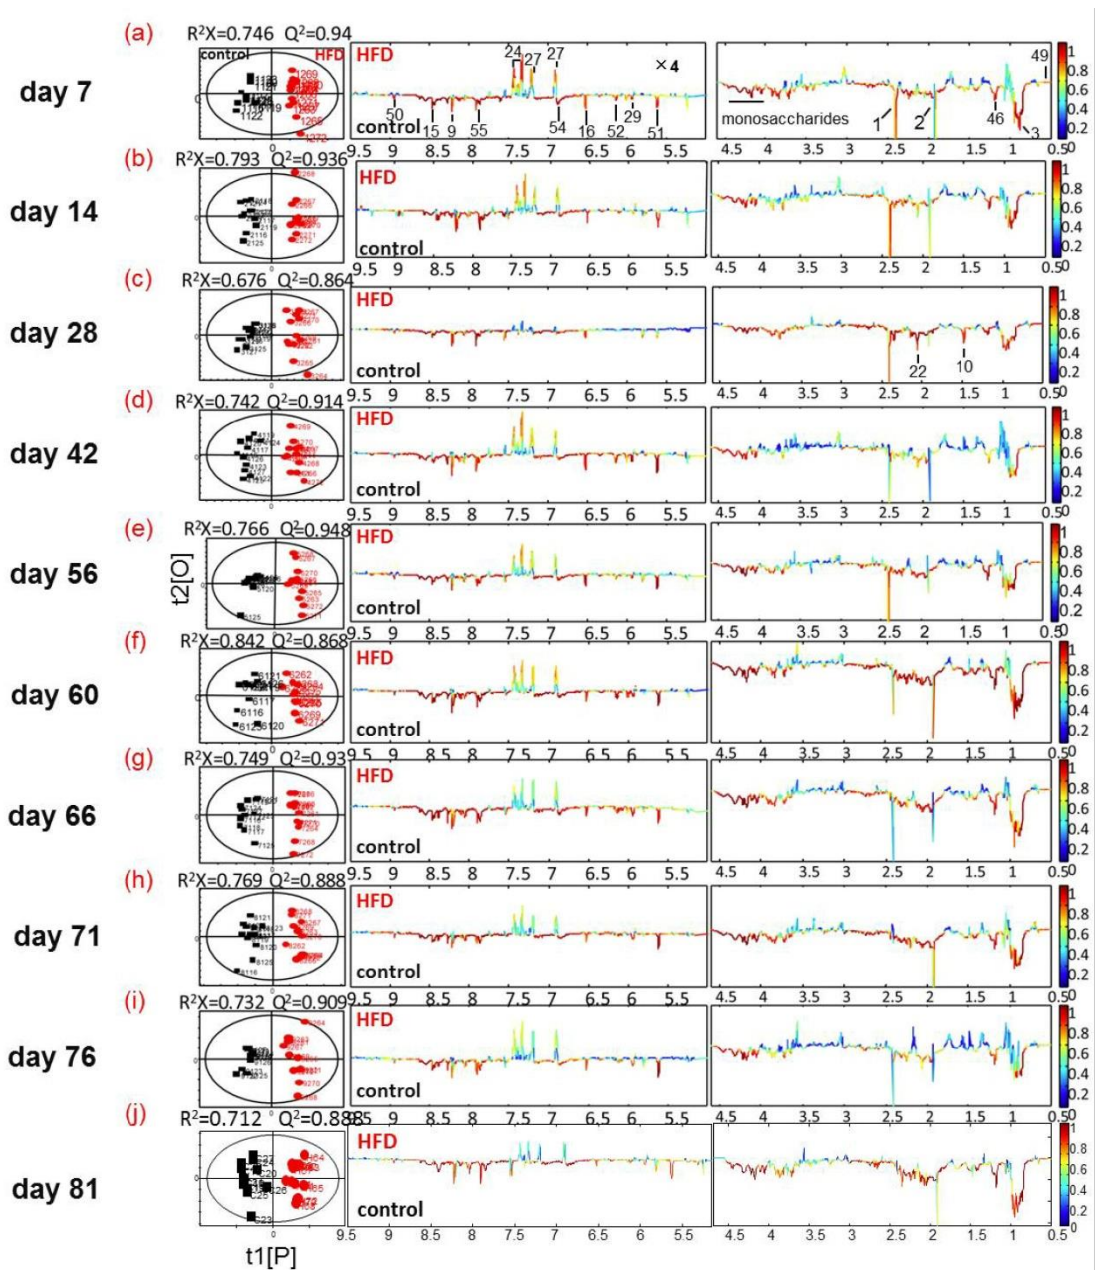

Supplementary Figure S2. OPLS-DA scores plots (left) and corresponding coefficient plots (right) for  $^1\text{H}$  NMR spectra of fecal water obtained from the HFD (red circle) and control (black squares) groups at several time points: (a) day 7; (b) day 14; (c) day 28; (d) day 42; (e) day 56; (f) day 60; (g) day 66; (h) day 71; (i) day 76; (j) day 81. Metabolite keys are shown in Table S1.

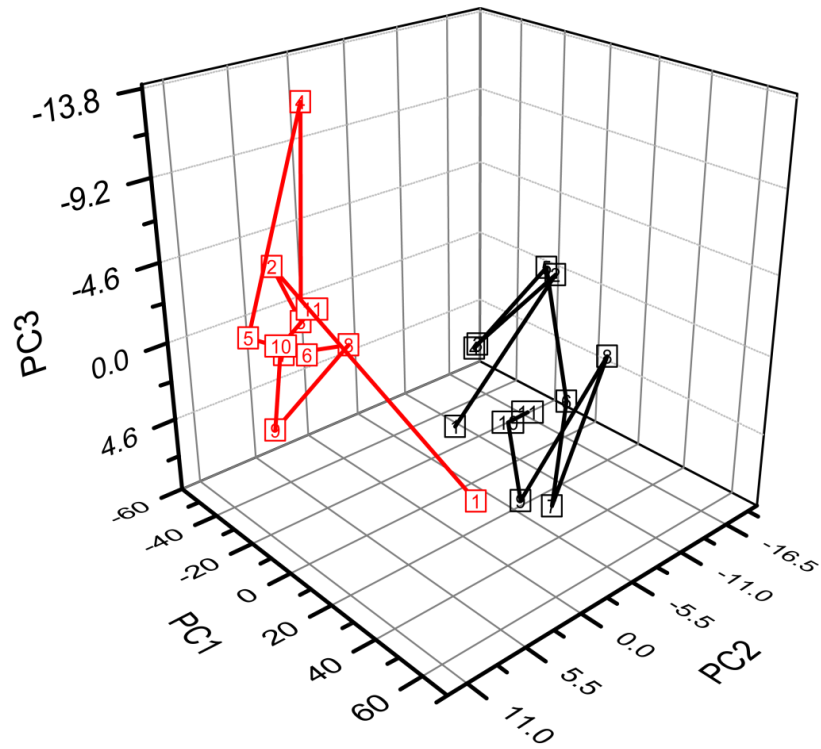

Supplementary Figure S3. 3D fecal metabolomic trajectory during dietary intervention derived from PCA using unit variance scaled data from two groups at (1)day 0, (2)day 7, (3)day 14, (4)day 28, (5)day 42, (6)day 56, (7)day 60, (8)day 66, (9)day 71, (10)day 76, (11)day 81. Each point represents the mean scores of three principal components at a given time point.

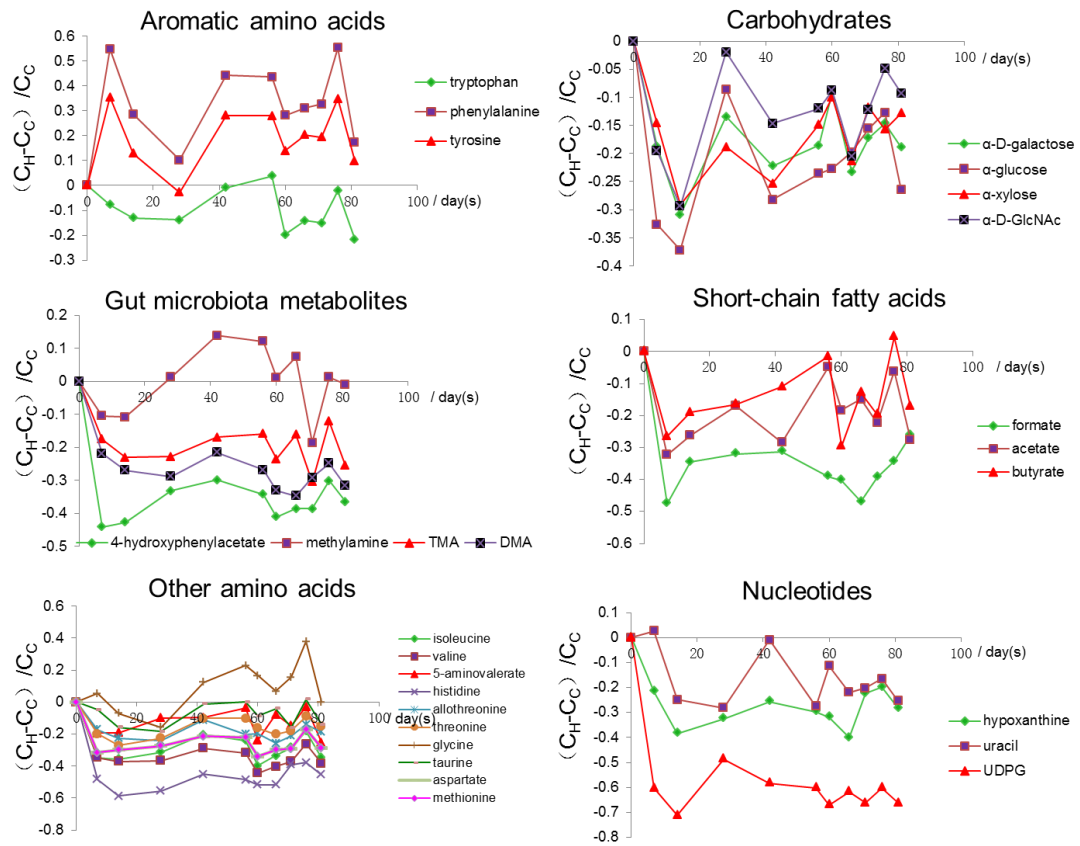

Supplementary Figure S4. The ratios of the HFD-induced concentration changes for fecal metabolites compared with controls. The ratios were expressed as  $(C_H - C_C) / C_C$ , where  $C_H$  and  $C_C$  stood for the average concentrations of a metabolite in HFD and control groups respectively.

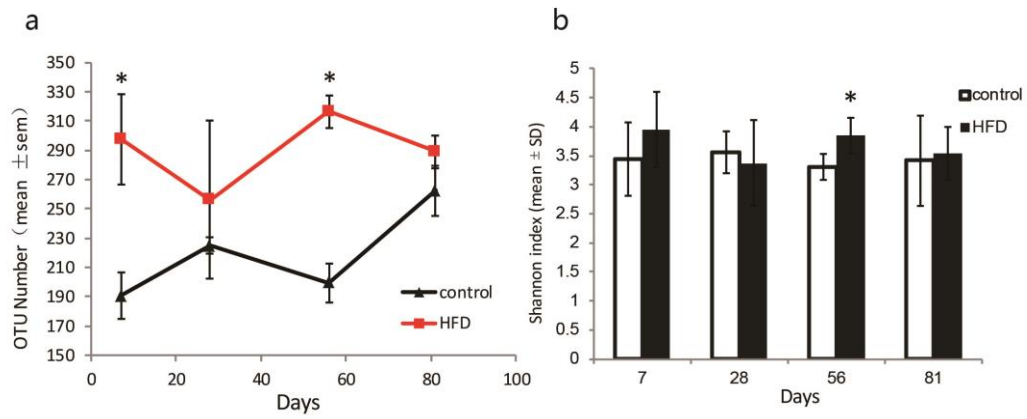

Supplementary Figure S5. The richness (a) and diversity(b) of gut microbiota at four time points after dietary intervention (day 7, day 28, day 56, day 81). \* $p < 0.05$  by the Student t-test or Kruskal-Wallis test.

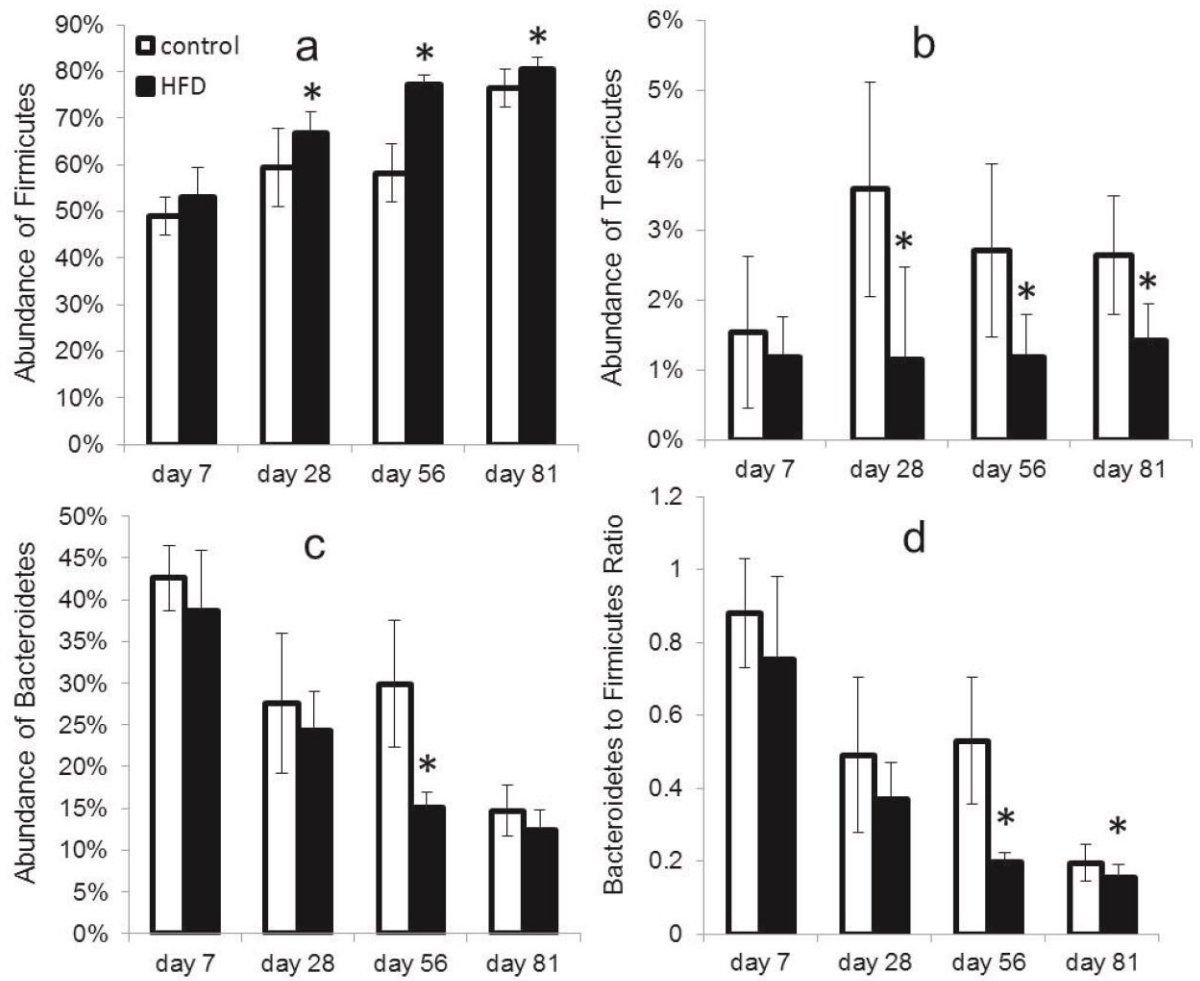

Supplementary Figure S6. The relative abundance of (a) Firmicutes, (b) Tenericutes, (c) Bacteroidetes and (d) the Firmicutes-to-Bacteroidetes ratio. \* $p < 0.05$ , by Student t-test or Kruskal-Wallis test and error bar represents the SD.

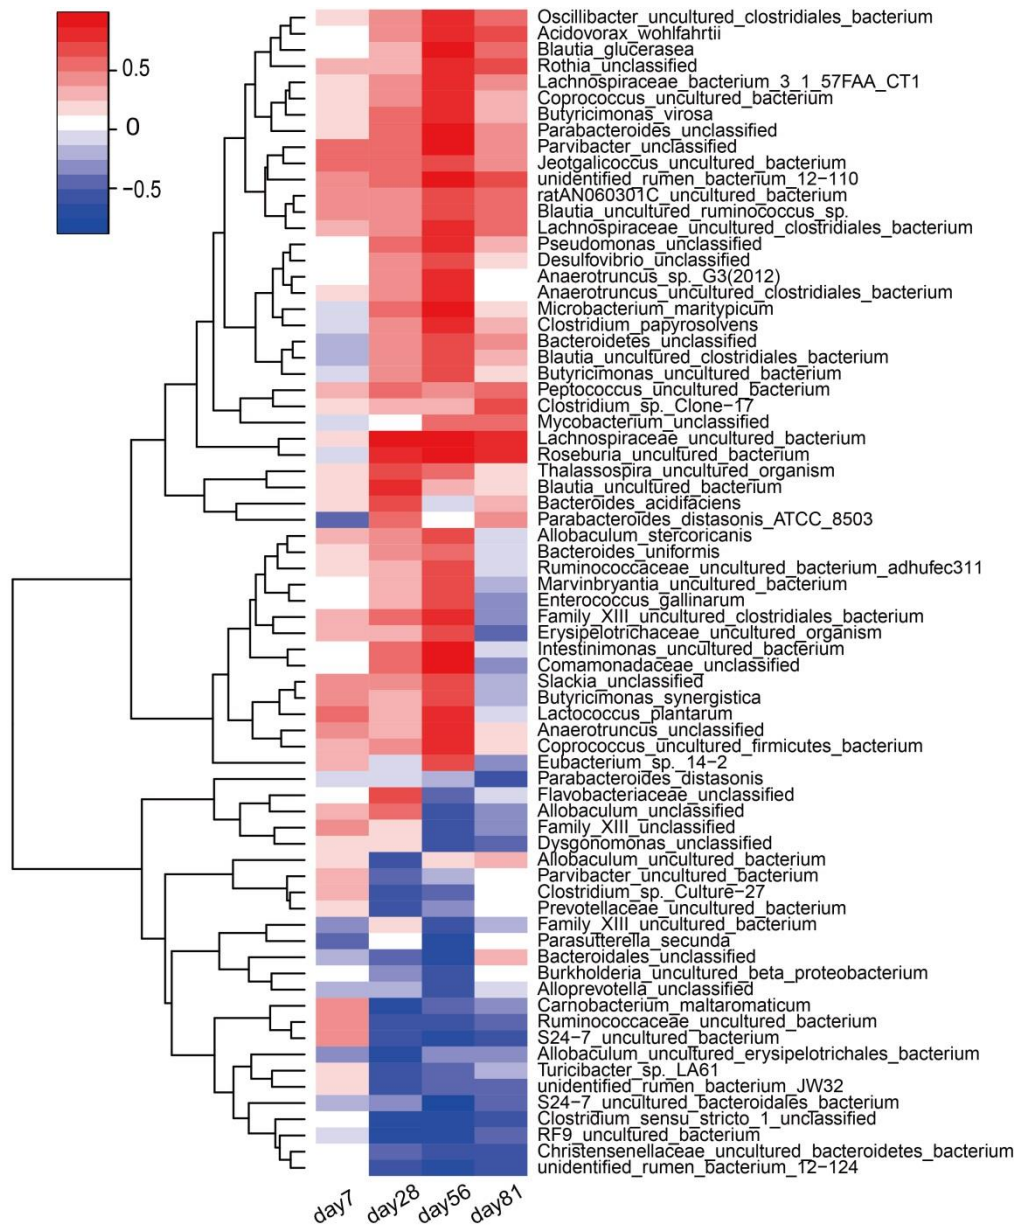

Supplementary Figure S7. The Heat map described the dynamic structural change of species-level community compared HFD group with the control. Red cells indicate the increasing of the bacteria, while blue cells indicate decreasing. The changes of bacteria with more intense colour are more significant.



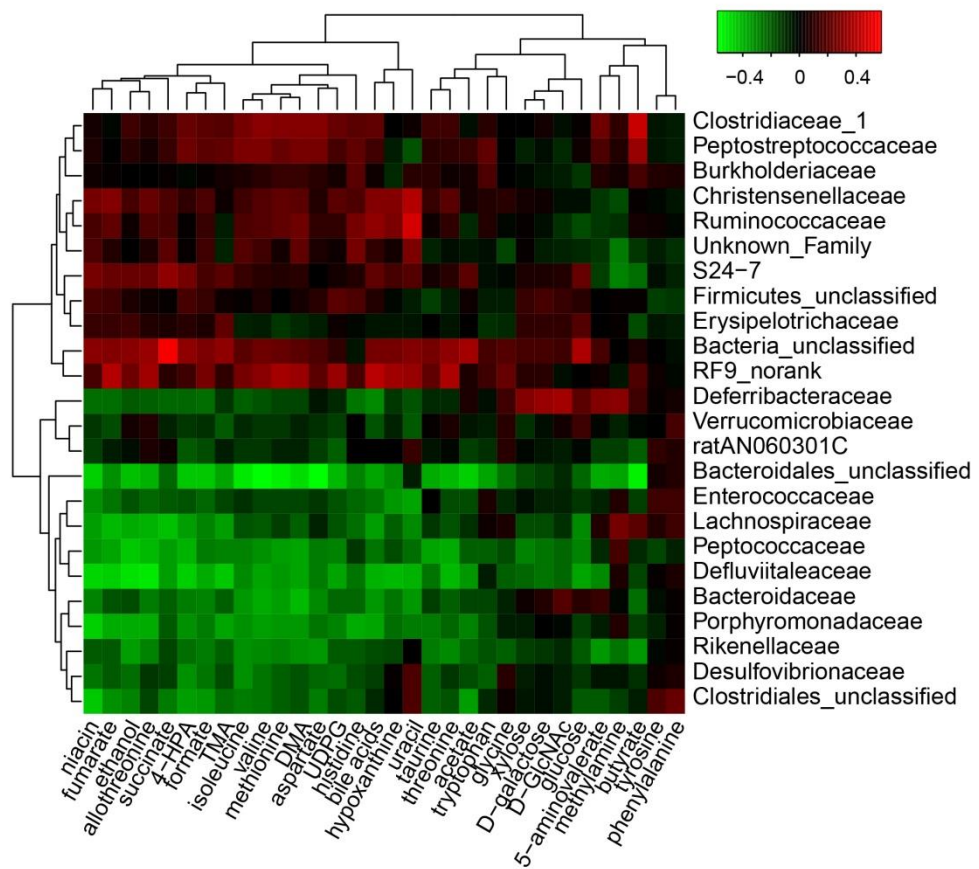

Supplementary Figure S8. Heatmap describing correlations between the HFD-induced significant changes of metabolites and of microbes in the family level with respective hierarchical clustering. The colored blocks represent the correlation coefficients with hot and cold color indicating positive and negative correlations respectively. 4-HPA: 4-Hydroxyphenylacetate; TMA: Trimethylamine; DMA: Dimethylamine; UDPG: Uridine diphosphate glucose; D-GlcNAc: N-Acetyl-D-glucosamine.

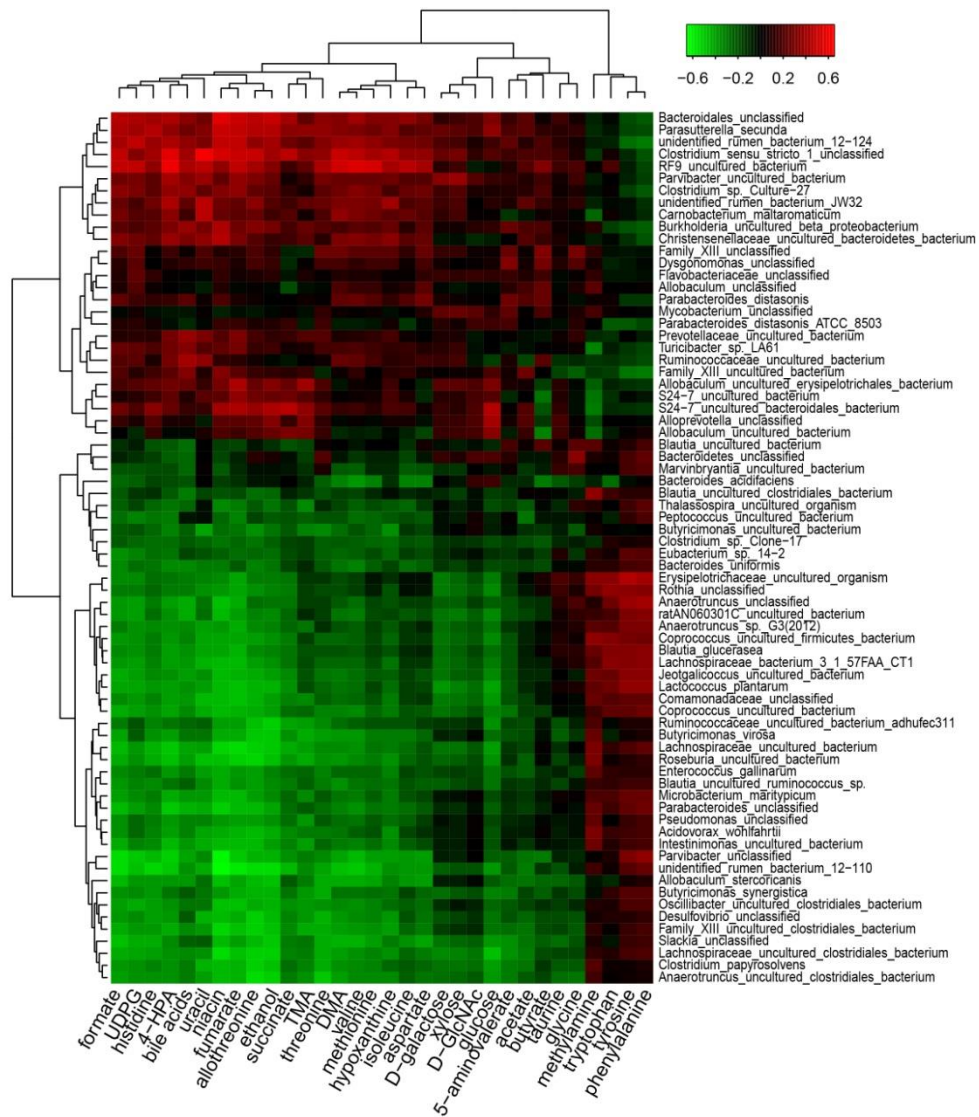

Supplementary Figure S9. Heatmap describing correlations between the HFD-induced significant changes of metabolites and of microbes in the species level with respective hierarchical clustering. The colored blocks represent the correlation coefficients with hot and cold color indicating positive and negative correlations respectively. 4-HPA: 4-Hydroxyphenylacetate; TMA: Trimethylamine; DMA: Dimethylamine; UDPG: Uridine diphosphate glucose; D-GlcNAc: N-Acetyl-D-glucosamine.

Supplementary Table S1. Assignments for NMR signals of fecal metabolites

| No. | Metabolites     | Group                      | $\delta$ <sup>1</sup> H (multiplicity) | $\delta$ <sup>13</sup> C |
|-----|-----------------|----------------------------|----------------------------------------|--------------------------|
| 1   | Succinate       | CH <sub>3</sub>            | 2.41(s) <sup>a</sup>                   | 36.88                    |
|     |                 | COO <sup>-</sup>           |                                        | 184.61                   |
| 2   | Acetate         | CH <sub>3</sub>            | 1.92(s)                                | 26.01                    |
|     |                 | COO <sup>-</sup>           |                                        | 184.19                   |
| 3   | Butyrate        | $\alpha$ CH <sub>2</sub>   | 2.16(t)                                | 42.45                    |
|     |                 | $\beta$ CH <sub>2</sub>    | 1.56(sextet)                           | 22.06                    |
|     |                 | $\gamma$ CH <sub>3</sub>   | 0.90(t)                                | 16.12                    |
|     |                 | COOH                       |                                        | 186.81                   |
| 4   | Lysine          | $\alpha$ CH                | 3.77(t)                                | 57.22                    |
|     |                 | $\beta$ CH <sub>2</sub>    | 1.91(m)                                | 32.62                    |
|     |                 | $\gamma$ CH <sub>2</sub>   | 1.48(m)                                | 24.07                    |
|     |                 | $\delta$ CH <sub>2</sub>   | 1.73(m)                                | 29.16                    |
|     |                 | $\epsilon$ CH <sub>2</sub> | 3.03(t)                                | 41.87                    |
|     |                 | COO <sup>-</sup>           |                                        | 177.23                   |
| 5   | Isoleucine      | $\alpha$ CH                | 3.68(d)                                | 62.37                    |
|     |                 | $\beta$ CH                 | 1.98(m)                                | 38.62                    |
|     |                 | $\gamma$ CH <sub>3</sub>   | 1.01(d)                                | 17.41                    |
|     |                 | $\gamma$ CH <sub>2</sub>   | 1.27(m)                                | 27.32                    |
|     |                 | $\gamma$ CH <sub>2</sub>   | 1.47(m)                                | 27.32                    |
|     |                 | $\delta$ CH <sub>3</sub>   | 0.94(t)                                | 13.91                    |
|     |                 | COO <sup>-</sup>           |                                        | 176.98                   |
| 6   | Threonine       | $\alpha$ CH                | 3.59(d)                                | 63.22                    |
|     |                 | $\beta$ CH                 | 4.26(dd)                               | 68.74                    |
|     |                 | $\gamma$ CH <sub>3</sub>   | 1.33(d)                                | 22.23                    |
|     |                 | COO <sup>-</sup>           |                                        | 177.05                   |
| 7   | Valine          | $\alpha$ CH                | 3.62(d)                                | 63.25                    |
|     |                 | $\beta$ CH                 | 2.28(m)                                | 31.86                    |
|     |                 | $\gamma$ CH <sub>3</sub>   | 1.04(d)                                | 20.72                    |
|     |                 | $\gamma$ CH <sub>3</sub>   | 0.99(d)                                | 19.41                    |
|     |                 | COO <sup>-</sup>           |                                        | 177.04                   |
| 8   | 5-Aminovalerate | $\alpha$ CH <sub>2</sub>   | 2.24(t)                                | 39.58                    |
|     |                 | $\beta$ CH <sub>2</sub>    | 1.64(m)                                | 25.45                    |
|     |                 | $\gamma$ CH <sub>2</sub>   | 1.68(m)                                | 29.23                    |
|     |                 | $\delta$ CH <sub>2</sub>   | 3.02(t)                                | 41.93                    |
|     |                 | COO <sup>-</sup>           |                                        | 185.28                   |
| 9   | Hypoxanthine    | CH                         | 8.20(s)                                | 148.39                   |

|    |                        |                   |          |                 |
|----|------------------------|-------------------|----------|-----------------|
| 10 | Alanine                | CH                | 8.22(s)  | 144.76          |
|    |                        | CH                | 3.79(q)  | 53.39           |
|    |                        | CH <sub>3</sub>   | 1.48(d)  | 18.97           |
|    |                        | COO <sup>-</sup>  |          | 178.81          |
| 11 | Choline                | CH <sub>3</sub>   | 3.21(s)  | 56.61           |
| 12 | Creatine               | CH <sub>2</sub>   | 3.93(s)  | 56.61           |
| 13 | Aspartate              | CH <sub>3</sub>   | 3.04(s)  | 40.21           |
|    |                        | αCH               | 3.91(m)  | 55.08           |
|    |                        | βCH <sub>2</sub>  | 2.82(m)  | 39.53           |
|    |                        | βCH <sub>2</sub>  | 2.69(m)  | 39.53           |
|    |                        | COO <sup>-</sup>  |          | 180.28          |
| 14 | DMA <sup>C</sup>       | CH <sub>3</sub>   | 2.76(s)  | 39.17           |
| 15 | Formate                | HCOO <sup>-</sup> | 8.46(s)  | 173.9           |
| 16 | Fumarate               | CH                | 6.52(s)  | nd <sup>b</sup> |
| 17 | Glutamine              | αCH               | 3.79(m)  | 57.11           |
|    |                        | βCH <sub>2</sub>  | 2.14(m)  | 29.66           |
|    |                        | γCH <sub>2</sub>  | 2.46(m)  | 33.37           |
|    |                        | C=O               |          | 180.51          |
| 18 | Glycine                | CH <sub>2</sub>   | 3.57(s)  | 44.28           |
|    |                        | COO <sup>-</sup>  |          | 175.11          |
| 19 | Lactate                | CH                | 4.11(m)  | 71.86           |
|    |                        | CH <sub>3</sub>   | 1.33(d)  | 22.23           |
|    |                        | COO <sup>-</sup>  |          | 185.05          |
| 20 | Leucine                | αCH               | 3.74(t)  | 56.39           |
|    |                        | βCH <sub>2</sub>  | 1.69(m)  | 42.68           |
|    |                        | γCH <sub>2</sub>  | 1.72(m)  | 29.26           |
|    |                        | CH <sub>3</sub>   | 0.96(d)  | 23.78           |
|    |                        | CH <sub>3</sub>   | 0.97(d)  | 24.78           |
|    |                        | COO <sup>-</sup>  |          | 177.22          |
| 21 | Proline                | αCH               | 4.14(dd) | 63.96           |
|    |                        | βCH <sub>2</sub>  | 2.36(m)  | 31.82           |
|    |                        | βCH <sub>2</sub>  | 2.07(m)  | 31.82           |
|    |                        | γCH <sub>2</sub>  | 2.01(m)  | 26.73           |
|    |                        | δCH <sub>2</sub>  | 3.34(m)  | 48.92           |
|    |                        | δCH <sub>2</sub>  | 3.42(m)  | 48.92           |
|    |                        | COO <sup>-</sup>  |          | nd              |
| 22 | Methionine             | αCH               | 3.87(m)  | 56.57           |
|    |                        | βCH <sub>2</sub>  | 2.19(m)  | 33.24           |
|    |                        | γCH <sub>2</sub>  | 2.65(t)  | 31.52           |
|    |                        | δCH <sub>3</sub>  | 2.14(s)  | 16.61           |
|    |                        | COO <sup>-</sup>  |          | nd              |
| 23 | N-acetyl-glycoproteins | CH <sub>3</sub>   | 2.06(s)  | 24.83           |
| 24 | Phenylalanine          | αCH               | 4.00(m)  | 58.72           |
|    |                        | βCH <sub>2</sub>  | 3.29(dd) | 39.24           |

|    |                           |                                   |                    |        |
|----|---------------------------|-----------------------------------|--------------------|--------|
|    |                           | $\beta\text{CH}_2$                | 3.13(dd)           | 39.24  |
|    |                           | 2CH,6CH                           | 7.43(t)            | 131.72 |
|    |                           | 4CH                               | 7.38(m)            | 130.41 |
|    |                           | 3CH,5CH                           | 7.33(dd)           | 132.03 |
|    |                           | C(ring)                           |                    | 137.85 |
|    |                           | $\text{COO}^-$                    |                    | 176.81 |
| 25 | Propionate                | $\text{CH}_3$                     | 1.06(t)            | 12.97  |
|    |                           | $\text{CH}_2$                     | 2.19(q)            | 33.22  |
|    |                           | $\text{COO}^-$                    |                    | 186.72 |
| 26 | TMA                       | $\text{CH}_3$                     | 2.88(s)            | 47.24  |
| 27 | Tyrosine                  | $\alpha\text{CH}$                 | 3.94(m)            | 58.96  |
|    |                           | $\beta\text{CH}_2$                | 3.06(m)            | 38.34  |
|    |                           | $\beta\text{CH}_2'$               | 3.20(m)            | 38.34  |
|    |                           | 2CH,6CH                           | 7.20(d)            | 133.43 |
|    |                           | 3CH,5CH                           | 6.90(d)            | 118.56 |
|    |                           | 1C                                |                    | 157.63 |
|    |                           | 4C                                |                    | 129.52 |
|    |                           | $\text{COO}^-$                    |                    | nd     |
| 28 | Uracil                    | CH                                | 5.81(d)            | 103.51 |
|    |                           | CH                                | 7.54(d)            | 146.22 |
|    |                           | C=O                               |                    | 156.59 |
|    |                           | C=O                               |                    | nd     |
| 29 | Uridine                   | 6CH(ring)                         | 7.88(d)            | nd     |
|    |                           | 5CH(ring)                         | 5.91(d)            | 92.86  |
|    |                           | 1CH(ribose)                       | 5.92(d)            | nd     |
|    |                           | $\text{CH}_2$ (ribose)            | 3.90(m)            | nd     |
|    |                           | 3CH(ribose)                       | 4.23(t)            | nd     |
|    |                           | 2CH(ribose)                       | 4.26(m)            | nd     |
| 30 | Taurine                   | $\text{CH}_2\text{-SO}_3\text{H}$ | 3.27(t)            | 50.44  |
|    |                           | $\text{CH}_2\text{-NH}_2$         | 3.43(t)            | 48.96  |
| 31 | $\alpha$ -Ketoisovalerate | $\text{CH}_3$                     | 1.13(d)            | 20.09  |
|    |                           | CH                                | 3.01(m)            | 40.3   |
|    |                           | $\alpha\text{CH}$                 | 4.00(dd)           | 58.84  |
|    |                           | $\text{COO}^-$                    |                    | 176.81 |
| 32 | $\alpha$ -Glucose         | 1CH                               | 5.24(d,3.73)       | 94.76  |
|    |                           | 2CH                               | 3.54(dd,9.89,3.62) | 74.35  |
|    |                           | 3CH                               | 3.73(dd)           | 75.42  |
|    |                           | 4CH                               | 3.42(dd)           | 72.39  |
|    |                           | 5CH                               | 3.84(m)            | 74.38  |
|    |                           | $\text{CH}_2$                     | 3.85(dd)           | 63.59  |
| 33 | $\beta$ -Glucose          | 1CH                               | 4.65(d,7.59)       | 98.76  |
|    |                           | 2CH                               | 3.25(t)            | 77.07  |
|    |                           | 3CH                               | 3.48(t)            | 78.84  |
|    |                           | 5CH                               | 3.48(t)            | 78.84  |

|    |                      |                     |              |        |
|----|----------------------|---------------------|--------------|--------|
|    |                      | CH <sub>2</sub>     | 4.06(m)      | 63.9   |
|    |                      | CH <sub>2</sub> '   | 3.76(dd)     | 63.9   |
| 34 | α-D-GlcNAc           | 1CH                 | 5.21(d,3.42) | 93.77  |
|    |                      | 2CH                 | 3.88(m)      | 56.83  |
|    |                      | 4CH                 | 3.86(m)      | 74.61  |
|    |                      | CH <sub>3</sub>     | 2.06(s)      | 25.03  |
| 35 | β-D-GlcNAc           | 1CH                 | 4.72(d)      | 97.94  |
|    |                      | CH <sub>3</sub>     | 2.06(s)      | 25.03  |
| 36 | α-D-Ribose           | 1CH                 | 5.39(d)      | 99.36  |
|    |                      | 2CH                 | 4.12(dd)     | nd     |
|    |                      | halfCH <sub>2</sub> | 3.73(dd)     | nd     |
| 37 | β-D-Ribose           | 1CH                 | 5.26(d)      | 103.79 |
|    |                      | 2CH                 | 4.01(m)      | nd     |
|    |                      | halfCH <sub>2</sub> | 3.69(dd)     | nd     |
| 38 | α-D-Galactose        | 1CH                 | 5.27(d)      | 95.2   |
|    |                      | 2CH                 | 3.81(m)      | nd     |
|    |                      | Half 2CH            | 3.74(dd)     | nd     |
| 39 | β-D-Galactose        | 1CH                 | 4.59(d)      | 99.37  |
|    |                      | 2CH                 | 3.50(m)      | nd     |
| 40 | α-D-Xylose           | 1CH                 | 5.20(d)      | 94.71  |
|    |                      | 2CH                 | 3.52(dd)     | nd     |
| 41 | β-D- Xylose          | 1CH                 | 4.58(d)      | 99.4   |
|    |                      | 2CH                 | 3.24(dd)     | nd     |
| 42 | Methylamine          | CH <sub>3</sub>     | 2.60(s)      | 27.44  |
| 43 | 2-Aminoisobutyrate   | CH <sub>3</sub>     | 1.48(s)      | 24.37  |
|    |                      | C                   |              | nd     |
|    |                      | COO <sup>-</sup>    |              | nd     |
| 44 | β-Fucose             | 6CH <sub>3</sub>    | 1.21(d)      | 18.39  |
|    |                      | 5CH                 | 4.20(m)      | 70     |
| 45 | α-Fucose             | CH <sub>3</sub>     | 1.25(d)      | 18.26  |
|    |                      | 5CH                 | 3.81(m)      | 74.16  |
|    |                      | 1CH                 | 5.28(d)      | 94.88  |
| 46 | <i>Allothreonine</i> | CH <sub>3</sub>     | 1.18(d)      | 22.05  |
|    |                      | CH-OH               | 4.28(m)      | 70.75  |
|    |                      | CH-NH <sub>2</sub>  | 3.87(dd)     | 63.15  |
| 47 | Ethanol              | CH <sub>2</sub>     | 1.19(t)      | nd     |
|    |                      | CH <sub>3</sub>     | 3.66(q)      | nd     |
| 48 | Cytidine             | 4CH                 | 5.91(d)      | nd     |
|    |                      | 3CH                 | 4.31(dd)     | nd     |
|    |                      | 2CH                 | 6.06(d)      | nd     |
|    |                      | 1CH                 | 7.85(d)      | nd     |
| 49 | Bile acid            | CH <sub>3</sub>     | 0.60-0.70(s) | nd     |
| 50 | Niacin               | 2CH                 | 8.94(s)      | nd     |
|    |                      | 5CH                 | 7.53         | nd     |

|    |                        |                              |          |        |
|----|------------------------|------------------------------|----------|--------|
|    |                        | 4CH                          | 8.26     | nd     |
|    |                        | 6CH                          | 8.61     | nd     |
| 51 | UDPG                   | 1CH(glucose ring)            | 5.62(dd) | nd     |
| 52 | AMP                    | 2CH                          | 8.61(s)  | nd     |
|    |                        | 7CH                          | 8.26(s)  | nd     |
|    |                        | 1CH'                         | 6.14(d)  | nd     |
|    |                        | 5CH'                         | 4.50(m)  | nd     |
|    |                        | 7CH'                         | 4.05(m)  | nd     |
| 53 | p-Cresol               | 3 or 5-CH                    | 6.83(d)  | 117.88 |
|    |                        | 2 or 6-CH                    | 7.15     | nd     |
| 54 | 4-HPA                  | 2, 6CH                       | 7.68(d)  | 131.94 |
|    |                        | 3, 5CH                       | 6.87(d)  | 118.34 |
| 55 | Histidine              | 3CH                          | 7.90(m)  | nd     |
|    |                        | 5CH                          | 7.86(m)  | nd     |
|    |                        | $\alpha$ CH                  | 3.99(m)  | nd     |
|    |                        | Half $\beta$ CH <sub>2</sub> | 3.13(m)  | nd     |
|    |                        | Half $\beta$ CH <sub>2</sub> | 3.27(m)  | nd     |
| 56 | 4-Hydroxyphenylacetate | 2, 6CH                       | 7.16(d)  | nd     |
|    |                        | 3, 5CH                       | 6.86(d)  | nd     |
| 57 | Tryptophan             | 8CH(indole)                  | 7.19(m)  | nd     |
|    |                        | 9CH(indole)                  | 7.29(m)  | nd     |
|    |                        | 6CH(indole)                  | 7.54(d)  | nd     |
|    |                        | 7CH(indole)                  | 7.74(d)  | nd     |
| 58 | Methanol               | CH <sub>3</sub>              | 3.36(s)  | 52.1   |
| 59 | 1-Methylnicotinamide   | 2CH                          | 9.29(s)  | nd     |
|    |                        | 4CH                          | 8.97(d)  | nd     |
|    |                        | 6CH                          | 8.91(dt) | nd     |
|    |                        | 5CH                          | 8.19(dd) | nd     |
|    |                        | CH <sub>3</sub>              | 4.48(s)  | nd     |

<sup>a</sup> represent the multiplicity: s, singlet; d, doublet; t, triplet; q, quartet; m, multiplet; dd, doublet.

of doublet. <sup>b</sup>nd means not detected. <sup>c</sup>DMA: Dimethylamine; TMA: Trimethylamine; UDPG: Uridine diphosphate glucose; AMP: Adenosine monophosphate; D-GlcNAc: N-Acetyl-D-glucosamine; 4-HPA: 4-hydroxyphenylacetate.

Supplementary Table S2 . The composition of fatty acids in two groups (control and HFD) at day 28 and day 56. The results are shown as mean ( $\mu\text{mol/g}$  dried stool)  $\pm$ SD. \* $p$ <0.05, \*\* $p$ <0.01, \*\*\* $p$ <0.001; c: compare control group at day 28 with day 56, #  $p$ <0.05.

| FAs         | control          |                               | HFD                            |                                |
|-------------|------------------|-------------------------------|--------------------------------|--------------------------------|
|             | day 28           | day 56                        | day 28                         | day 56                         |
| C12:0       | 0.5 $\pm$ 0.1    | 1 $\pm$ 0.1 <sup>#</sup>      | 0.4 $\pm$ 0.1                  | 0.7 $\pm$ 0.1 <sup>**b</sup>   |
| C14:0       | 5.5 $\pm$ 1.2    | 8.6 $\pm$ 1.2 <sup>#</sup>    | 11.4 $\pm$ 1.2 <sup>**</sup>   | 14.3 $\pm$ 1.7 <sup>**</sup>   |
| C15:0       | 3.6 $\pm$ 1.0    | 4 $\pm$ 0.4                   | 3.7 $\pm$ 1.0 <sup>**</sup>    | 4.8 $\pm$ 0.6 <sup>**</sup>    |
| C16:0&C16:1 | 121.8 $\pm$ 22.3 | 175.9 $\pm$ 30.6 <sup>#</sup> | 287.2 $\pm$ 22.3 <sup>**</sup> | 345.4 $\pm$ 38.7 <sup>**</sup> |
| C18:0&C18:1 | 127 $\pm$ 12.9   | 192.1 $\pm$ 45.6 <sup>#</sup> | 436.3 $\pm$ 37.1 <sup>*</sup>  | 484.8 $\pm$ 57.2 <sup>**</sup> |
| C18:2       | 14.8 $\pm$ 4.9   | 23.2 $\pm$ 1.3                | 12 $\pm$ 4.9 <sup>**</sup>     | 12.1 $\pm$ 2.4 <sup>*</sup>    |
| C19:0       | 1.6 $\pm$ 0.7    | 2.6 $\pm$ 0.3                 | 2.2 $\pm$ 0.7 <sup>*</sup>     | 2.6 $\pm$ 0.4 <sup>*</sup>     |
| C20:0       | 3.8 $\pm$ 0.5    | 4.6 $\pm$ 0.5 <sup>#</sup>    | 4.6 $\pm$ 0.5 <sup>*</sup>     | 5 $\pm$ 0.7 <sup>*</sup>       |
| C20:1       | 2.1 $\pm$ 0.7    | 2 $\pm$ 0.4                   | 2.7 $\pm$ 0.7 <sup>*</sup>     | 2.4 $\pm$ 0.4 <sup>*</sup>     |
| C22:1       | 3.7 $\pm$ 0.8    | 4.2 $\pm$ 0.2                 | 1.8 $\pm$ 0.8 <sup>***</sup>   | 2.1 $\pm$ 0.3 <sup>**</sup>    |
| C24:0       | 3.7 $\pm$ 0.7    | 4.6 $\pm$ 0.2 <sup>#</sup>    | 1.5 $\pm$ 0.7 <sup>**</sup>    | 1.8 $\pm$ 0.3 <sup>**</sup>    |



Supplementary Table S3. The scores of multivariate statistical analysis compared HFD group with control group at day 0,day 7,day 14,day 28,day 42,day 56, day 60, day 66, day 71, day 76 and day 81 after dietary intervention.

| day(s) | PCA              |                | permutation test | OPLS-DA          |                | p value <sup>a</sup> |
|--------|------------------|----------------|------------------|------------------|----------------|----------------------|
|        | R <sup>2</sup> X | Q <sup>2</sup> |                  | R <sup>2</sup> X | Q <sup>2</sup> |                      |
| 0      | 0.908            | 0.675          | × <sup>b</sup>   | 0.466            | -0.309         | 1.00E+00             |
| 7      | 0.901            | 0.828          | √                | 0.746            | 0.940          | 5.39E-09             |
| 14     | 0.927            | 0.866          | √                | 0.793            | 0.936          | 6.13E-10             |
| 28     | 0.794            | 0.649          | √                | 0.676            | 0.864          | 5.25E-08             |
| 42     | 0.822            | 0.627          | √                | 0.742            | 0.914          | 2.47E-09             |
| 56     | 0.853            | 0.747          | √                | 0.766            | 0.948          | 2.61E-09             |
| 60     | 0.870            | 0.746          | √                | 0.842            | 0.868          | 7.46E-07             |
| 66     | 0.791            | 0.486          | √                | 0.749            | 0.930          | 3.55E-10             |
| 71     | 0.926            | 0.836          | √                | 0.769            | 0.888          | 2.53E-08             |
| 76     | 0.880            | 0.775          | √                | 0.732            | 0.909          | 1.18E-08             |
| 81     | 0.798            | 0.646          | √                | 0.712            | 0.888          | 8.44E-09             |

a: p values were generated by CV-ANOVA. b ×: pattern of PLS-DA is not successfully checked by permutation test; √: pattern of PLS-DA is successfully checked by permutation test.

Supplementary Table S4. Pearson correlation coefficient values for the HFD-induced significant changes of microbial species at day 7, day 28, day 56 and day 81 (p<0.05). Red indicates increases and blue decreases.

| Species-Bacteria                                              | day7 | day28  | day56  | day81  |
|---------------------------------------------------------------|------|--------|--------|--------|
| <i>Acidovorax_wohlfahrtii</i>                                 | -    | -      | 0.854  | 0.613  |
| <i>Allobaculum_stercoricanis</i>                              | -    | -      | 0.673  | -      |
| <i>Allobaculum_unclassified</i>                               | -    | 0.577  | -0.721 | -      |
| <i>Allobaculum_uncultured_bacterium</i>                       | -    | -0.622 | -      | -      |
| <i>Allobaculum_uncultured_erysipelotrichales_bacterium</i>    | -    | -0.751 | -      | -      |
| <i>Alloprevotella_unclassified</i>                            | -    | -      | -0.723 | -      |
| <i>Anaerotruncus_sp._G3(2012)</i>                             | -    | -      | 0.824  | -      |
| <i>Anaerotruncus_unclassified</i>                             | -    | -      | 0.799  | -      |
| <i>Anaerotruncus_uncultured_clostridiales_bacterium</i>       | -    | -      | 0.734  | -      |
| <i>Bacteroidales_unclassified</i>                             | -    | -      | -0.792 | -      |
| <i>Bacteroides_acidifaciens</i>                               | -    | 0.682  | -      | -      |
| <i>Bacteroides_uniformis</i>                                  | -    | -      | 0.593  | -      |
| <i>Bacteroidetes_unclassified</i>                             | -    | -      | 0.704  | -      |
| <i>Blautia_glucerasea</i>                                     | -    | -      | 0.901  | -      |
| <i>Blautia_uncultured_bacterium</i>                           | -    | 0.763  | -      | -      |
| <i>Blautia_uncultured_clostridiales_bacterium</i>             | -    | -      | 0.665  | -      |
| <i>Blautia_uncultured_ruminococcus_sp.</i>                    | -    | -      | 0.600  | -      |
| <i>Burkholderia_uncultured_beta_proteobacterium</i>           | -    | -      | -0.620 | -      |
| <i>Butyricimonas_synergistica</i>                             | -    | -      | 0.625  | -      |
| <i>Butyricimonas_uncultured_bacterium</i>                     | -    | -      | 0.653  | -      |
| <i>Butyricimonas_virosa</i>                                   | -    | -      | 0.756  | -      |
| <i>Carnobacterium_maltaromaticum</i>                          | -    | -0.812 | -      | -      |
| <i>Christensenellaceae_uncultured_bacteroidetes_bacterium</i> | -    | -0.595 | -0.693 | -0.647 |
| <i>Clostridium_papyrosolvens</i>                              | -    | -      | 0.816  | -      |
| <i>Clostridium_sensu_stricto_1_unclassified</i>               | -    | -0.807 | -0.842 | -0.654 |
| <i>Clostridium_sp._Clone-17</i>                               | -    | -      | -      | 0.602  |
| <i>Clostridium_sp._Culture-27</i>                             | -    | -0.616 | -      | -      |
| <i>Comamonadaceae_unclassified</i>                            | -    | -      | 0.945  | -      |
| <i>Coprococcus_uncultured_bacterium</i>                       | -    | -      | 0.834  | -      |
| <i>Coprococcus_uncultured_firmicutes_bacterium</i>            | -    | -      | 0.829  | -      |
| <i>Desulfovibrio_unclassified</i>                             | -    | -      | 0.676  | -      |
| <i>Dysgonomonas_unclassified</i>                              | -    | -      | -0.622 | -      |
| <i>Enterococcus_gallinarum</i>                                | -    | -      | 0.625  | -      |
| <i>Erysipelotrichaceae_uncultured_organism</i>                | -    | -      | 0.704  | -0.553 |
| <i>Eubacterium_sp._14-2</i>                                   | -    | -      | 0.601  | -      |
| <i>Family_XIII_unclassified</i>                               | -    | -      | -0.717 | -      |
| <i>Family_XIII_uncultured_bacterium</i>                       | -    | -      | -0.671 | -      |
| <i>Family_XIII_uncultured_clostridiales_bacterium</i>         | -    | -      | 0.774  | -      |
| <i>Flavobacteriaceae_unclassified</i>                         | -    | 0.608  | -      | -      |
| <i>Intestinimonas_uncultured_bacterium</i>                    | -    | -      | 0.964  | -      |

|                                                           |   |        |        |        |
|-----------------------------------------------------------|---|--------|--------|--------|
| <i>Jeotgalicoccus_uncultured_bacterium</i>                | - | -      | 0.709  | -      |
| <i>Lachnospiraceae_bacterium_3_1_57FAA_CT1</i>            | - | -      | 0.809  | -      |
| <i>Lachnospiraceae_uncultured_bacterium</i>               | - | 0.920  | 0.940  | 0.810  |
| <i>Lachnospiraceae_uncultured_clostridiales_bacterium</i> | - | -      | 0.764  | 0.565  |
| <i>Lactococcus_plantarum</i>                              | - | -      | 0.798  | -      |
| <i>Marvinbryantia_uncultured_bacterium</i>                | - | -      | 0.611  | -      |
| <i>Microbacterium_maritypicum</i>                         | - | 0.583  | 0.887  | -      |
| <i>Mycobacterium_unclassified</i>                         | - | -      | -      | 0.554  |
| <i>Oscillibacter_uncultured_clostridiales_bacterium</i>   | - | -      | 0.859  | 0.592  |
| <i>Parabacteroides_distasonis</i>                         | - | -      | -      | -0.632 |
| <i>Parabacteroides_distasonis_ATCC_8503</i>               | - | 0.593  | -      | -      |
| <i>Parabacteroides_unclassified</i>                       | - | 0.582  | 0.993  | -      |
| <i>Parasutterella_secunda</i>                             | - | -      | -0.830 | -      |
| <i>Parvibacter_unclassified</i>                           | - | -      | 0.915  | -      |
| <i>Parvibacter_uncultured_bacterium</i>                   | - | -0.593 | -      | -      |
| <i>Peptococcus_uncultured_bacterium</i>                   | - | -      | -      | 0.581  |
| <i>Prevotellaceae_uncultured_bacterium</i>                | - | -0.699 | -      | -      |
| <i>Pseudomonas_unclassified</i>                           | - | -      | 0.776  | -      |
| <i>RF9_uncultured_bacterium</i>                           | - | -0.754 | -0.734 | -      |
| <i>Roseburia_uncultured_bacterium</i>                     | - | 0.804  | 0.922  | 0.814  |
| <i>Rothia_unclassified</i>                                | - | -      | 0.823  | 0.726  |
| <i>Ruminococcaceae_uncultured_bacterium</i>               | - | -0.655 | -0.643 | -0.573 |
| <i>Ruminococcaceae_uncultured_bacterium_adhufec311</i>    | - | -      | 0.688  | -      |
| <i>S24-7_uncultured_bacterium</i>                         | - | -0.604 | -0.745 | -0.613 |
| <i>S24-7_uncultured_bacteroidales_bacterium</i>           | - | -      | -0.882 | -      |
| <i>Slackia_unclassified</i>                               | - | -      | 0.641  | -      |
| <i>Thalassospira_uncultured_organism</i>                  | - | 0.600  | -      | -      |
| <i>Turicibacter_sp._LA61</i>                              | - | -0.696 | -      | -      |
| <i>ratAN060301C_uncultured_bacterium</i>                  | - | -      | 0.672  | -      |
| <i>unidentified_rumen_bacterium_12-110</i>                | - | -      | 0.901  | 0.650  |
| <i>unidentified_rumen_bacterium_12-124</i>                | - | -0.663 | -0.809 | -0.676 |
| <i>unidentified_rumen_bacterium_JW32</i>                  | - | -0.723 | -      | -      |

Supplementary Table S5. Correlations between the HFD-induced changes of fecal bile acids and of microbes in the family, genus and species levels (p-values were Pearson correlation coefficients with red ones indicating positive correlations whereas the blue ones indicating negative correlations).

|                                                            | bile acids |
|------------------------------------------------------------|------------|
| <b>family</b>                                              |            |
| Deferribacteraceae                                         | -0.255     |
| Defluviitaleaceae                                          | -0.263     |
| Porphyromonadaceae                                         | -0.384     |
| Ruminococcaceae                                            | 0.257      |
| Bacteroidales_unclassified                                 | -0.297     |
| Unknown_Family                                             | 0.261      |
| <b>genus</b>                                               |            |
| <i>Anaerotruncus</i>                                       | -0.258     |
| <i>Blautia</i>                                             | -0.43      |
| <i>Burkholderia</i>                                        | 0.282      |
| <i>Caulobacter</i>                                         | 0.323      |
| <i>Coprobacillus</i>                                       | -0.245     |
| <i>Coprococcus</i>                                         | -0.332     |
| <i>Escherichia-Shigella</i>                                | -0.313     |
| <i>Intestinimonas</i>                                      | -0.421     |
| <i>Oscillibacter</i>                                       | -0.313     |
| <i>Parabacteroides</i>                                     | -0.299     |
| <i>Roseburia</i>                                           | -0.409     |
| <i>Pseudobutyrvibrio</i>                                   | -0.325     |
| <i>Bacteria_unclassified</i>                               | 0.344      |
| <i>Christensenellaceae_uncultured</i>                      | 0.341      |
| <i>Defluviitaleaceae_unclassified</i>                      | -0.345     |
| <i>Erysipelotrichaceae_uncultured</i>                      | -0.262     |
| <i>Family_XIII_unclassified</i>                            | 0.375      |
| <i>Lachnospiraceae_norank</i>                              | -0.34      |
| <i>Lachnospiraceae_unclassified</i>                        | -0.397     |
| <i>Lachnospiraceae_uncultured</i>                          | -0.431     |
| <i>Peptostreptococcaceae_incertae_sedis</i>                | 0.244      |
| <i>Prevotellaceae_unclassified</i>                         | 0.376      |
| <i>RF9_norank</i>                                          | 0.468      |
| <i>Ruminococcaceae_unclassified</i>                        | 0.318      |
| <i>Ruminococcaceae_uncultured</i>                          | 0.397      |
| <b>species</b>                                             |            |
| <i>Acidovorax_wohlfahrtii</i>                              | -0.327     |
| <i>Allobaculum_stercoricanis</i>                           | -0.387     |
| <i>Allobaculum_uncultured_erysipelotrichales_bacterium</i> | 0.255      |

|                                                               |        |
|---------------------------------------------------------------|--------|
| <i>Anaerotruncus_sp._G3(2012)</i>                             | -0.355 |
| <i>Anaerotruncus_unclassified</i>                             | -0.442 |
| <i>Anaerotruncus_uncultured_clostridiales_bacterium</i>       | -0.319 |
| <i>Bacteroidales_unclassified</i>                             | 0.343  |
| <i>Bacteroides_uniformis</i>                                  | -0.339 |
| <i>Bacteroidetes_unclassified</i>                             | -0.255 |
| <i>Blautia_glucerasea</i>                                     | -0.358 |
| <i>Blautia_uncultured_bacterium</i>                           | -0.273 |
| <i>Blautia_uncultured_clostridiales_bacterium</i>             | -0.309 |
| <i>Blautia_uncultured_ruminococcus_sp.</i>                    | -0.250 |
| <i>Burkholderia_uncultured_beta_proteobacterium</i>           | 0.384  |
| <i>Butyricimonas_uncultured_bacterium</i>                     | -0.246 |
| <i>Butyricimonas_virosa</i>                                   | -0.295 |
| <i>Christensenellaceae_uncultured_bacteroidetes_bacterium</i> | 0.308  |
| <i>Clostridium_papyrosolvens</i>                              | -0.307 |
| <i>Clostridium_sensu_stricto_1_unclassified</i>               | 0.392  |
| <i>Clostridium_sp._Culture-27</i>                             | 0.363  |
| <i>Comamonadaceae_unclassified</i>                            | -0.379 |
| <i>Coprococcus_uncultured_bacterium</i>                       | -0.345 |
| <i>Coprococcus_uncultured_firmicutes_bacterium</i>            | -0.323 |
| <i>Enterococcus_gallinarum</i>                                | -0.317 |
| <i>Erysipelotrichaceae_uncultured_organism</i>                | -0.308 |
| <i>Family_XIII_uncultured_bacterium</i>                       | 0.329  |
| <i>Family_XIII_uncultured_clostridiales_bacterium</i>         | -0.348 |
| <i>Intestinimonas_uncultured_bacterium</i>                    | -0.382 |
| <i>Jeotgalicoccus_uncultured_bacterium</i>                    | -0.393 |
| <i>Lachnospiraceae_bacterium_3_1_57FAA_CT1</i>                | -0.385 |
| <i>Lachnospiraceae_uncultured_bacterium</i>                   | -0.423 |
| <i>Lachnospiraceae_uncultured_clostridiales_bacterium</i>     | -0.354 |
| <i>Lactococcus_plantarum</i>                                  | -0.371 |
| <i>Marvinbryantia_uncultured_bacterium</i>                    | -0.258 |
| <i>Microbacterium_maritypicum</i>                             | -0.387 |
| <i>Oscillibacter_uncultured_clostridiales_bacterium</i>       | -0.297 |
| <i>Parabacteroides_unclassified</i>                           | -0.452 |
| <i>Parasutterella_secunda</i>                                 | 0.270  |
| <i>Parvibacter_unclassified</i>                               | -0.411 |
| <i>Parvibacter_uncultured_bacterium</i>                       | 0.330  |
| <i>Prevotellaceae_uncultured_bacterium</i>                    | 0.375  |
| <i>Pseudomonas_unclassified</i>                               | -0.325 |
| <i>RF9_uncultured_bacterium</i>                               | 0.443  |
| <i>Roseburia_uncultured_bacterium</i>                         | -0.397 |
| <i>Rothia_unclassified</i>                                    | -0.312 |
| <i>Ruminococcaceae_uncultured_bacterium</i>                   | 0.415  |
| <i>Ruminococcaceae_uncultured_bacterium_adhufec311</i>        | -0.268 |

|                                            |        |
|--------------------------------------------|--------|
| <i>Thalassospira_uncultured_organism</i>   | -0.259 |
| <i>Turicibacter_sp._LA61</i>               | 0.331  |
| <i>ratAN060301C_uncultured_bacterium</i>   | -0.440 |
| <i>unidentified_rumen_bacterium_12-110</i> | -0.361 |
| <i>unidentified_rumen_bacterium_12-124</i> | 0.362  |
| <i>unidentified_rumen_bacterium_JW32</i>   | 0.251  |

---

## Supporting information for materials and methods

### Chemicals

Deuterium oxide (D<sub>2</sub>O, 99.9 atom %D), Methyl tricosanate (99.0%), methyl heptadecanoate (99.0%) and acetyl chloride were purchased from Sigma-Aldrich Inc. (St. Louis, MO) and sodium 3-trimethylsilyl [2,2,3,3-<sup>2</sup>H<sub>4</sub>] propionate (TSP) was bought from Cambridge Isotope Laboratories, Inc. (Tewksbury, MA, USA). Sodium azide (NaN<sub>3</sub>) was bought from Fuchen Chemical Reagent Company (Tianjin, China) whilst K<sub>2</sub>CO<sub>3</sub>, K<sub>2</sub>HPO<sub>4</sub> 3H<sub>2</sub>O, NaH<sub>2</sub>PO<sub>4</sub> 2H<sub>2</sub>O were from Sinopharm Chemical Co. Ltd (Shanghai, China). A mixed standard of 37 fatty acid methyl esters and 3,5-ditertbutyl-4-hydroxytoluene (BHT) were obtained from Supelco (Bellefonte, PA).

### Sample Preparation for NMR and GC-FID/MS Analysis

Each fecal sample (about 60 mg) was individually extracted by vortex mixing with 600 μL phosphate buffer followed with freeze-thaw treatment thrice and homogenization with tissue lyser (QIAGEN, Hilden, Germany) at 20 Hz for 90s. The supernatants were obtained after 10 mins centrifugation (16000 x g, 4 °C). After repeating this extraction of the residues once, two supernatants from each sample were pooled together and centrifuged for another 10 mins (16000 x

g, 4°C). 600  $\mu$ L supernatant from each sample was individually transferred into a 5 mm NMR tube for analysis.

For fatty acid methylation, about 2 mg feces sample was homogenized with 0.1 mL methanol in a Pyrex tube followed with freeze-thaw thrice. 1 mL mixed solvent of methanol and hexane (4:1; v/v) was added into the above mixture together with 20  $\mu$ L internal standards (containing 0.2mg/ml of BHT, 0.05mg/mL methyl tricosanate and 0.1mg/mL methyl heptadecanoate). The mixture were cooled and subjected to acetyl chloride catalyzed methylation for 24 hours in the dark (ambient temperature was 25°C). Methyl esters of fatty acids extracted with hexane thrice followed with extract combination, removal of solvent and reconstitution into 50  $\mu$ L hexane before GC-FID/MS analysis.

#### **Analysis of Fatty Acids with GC-FID/MS**

The measurement of fatty acids of fecal samples was done on a Shimadzu GCMS-QP2010Plus spectrometer (Shimadzu Scientific Instruments) as reported previously<sup>27,35</sup> with some minor modifications. The temperature of injection port and flame ionization detector (FID) were both set to 230°C. The temperature gradient started with 45°C for 1 min and then was increased to 195°C (30°C/min). After holding at 195°C for 3 mins, temperature was raised to 230°C/min with a rate of 7°C/min and kept for 1 min. The methylated fatty acids in fecal samples were identified by comparing their retention times and mass spectrometry data with a mixed standard of methylated fatty acids whilst quantified using internal standards. The levels of fatty acids were expressed as  $\mu$ mol fatty acids per gram of dry fecal sample.

#### **NMR Analysis of Fecal Extracts**

All NMR spectra were acquired at 298 K on a Bruker AVANCE III 600 MHz NMR

spectrometer having an inverse cryogenic probe (Bruker Biospin, Germany) with  $^1\text{H}$  and  $^{13}\text{C}$  frequencies of 600.13 and 150.90 MHz, respectively. One-dimensional  $^1\text{H}$  NMR spectra were acquired using standard noesygppr1d pulse sequence with the recycle delay of 2 s, mixing time of 100 ms and acquisition time of 1.36 s.  $90^\circ$  pulse width was adjusted to about  $10\ \mu\text{s}$  for each sample and 128 transients were collected into 32 000 data points over a spectral width of 20 ppm. For resonance assignments, a set of two-dimensional NMR spectra was acquired for some selected samples including  $^1\text{H}$  J-resolved spectroscopy ( $^1\text{H}$  JRES),  $^1\text{H}$ - $^1\text{H}$  total correlation spectroscopy (TOCSY),  $^1\text{H}$ - $^1\text{H}$  correlation spectroscopy (COSY),  $^1\text{H}$ - $^{13}\text{C}$  heteronuclear single quantum correlation (HSQC) and  $^1\text{H}$ - $^{13}\text{C}$  heteronuclear multiple bond correlation (HMBC) spectra.

#### **NMR Data Processing and Multivariate Data Analysis**

All FIDs obtained from one-dimensional NMR experiments were multiplied with an exponential window function with a line-broadening factor of 1 Hz prior to Fourier transformation. All spectra were corrected for phase and baseline using the software TOPSPIN (V3.0, Bruker Biospin, Germany) with chemical shift referenced to the methyl signal of TSP ( $\delta$  0.00). The spectral region of  $\delta$  0.5-9.5 was then bucketed into bins with the width of 0.004 ppm (2.4 Hz) using AMIX software (V3.8.3, Bruker Biospin) and the region of  $\delta$  4.68-5.15 was discarded to eliminate the distorted water signal. The integrated areas of all bins were normalized to the dry sample weights so that the resultant data represented the absolute concentration of bins (or metabolites) in the form of peak area per milligram dry sample.
